# Supplementary material
Source: publisher figshare collection journal article supplement (https://diabetesjournals.figshare.com/articles/dataset/_/19134545)
Supplement: Supplementary file 1 [file 1]

### Supplemental figure legend

**Suppl. Fig. 1. Pregnancy increases  $\alpha$ -cell mass but not through changing  $\alpha$ -cell size, neogenesis, and transdifferentiation.** a, Individual  $\alpha$ -cell areas were determined using the ImageJ software with IF images. At least 6-10 islets per dam were measured. The average  $\alpha$ -cell areas of each dam was used for statistical analysis. b, Non-pregnant *Ai9;Gcg<sup>CreErt2</sup>* reporter mice gavaged with tamoxifen (1 mg per day) for 5 days to label  $\alpha$ -cells with tdTomato (RFP). IF was performed using an anti-glucagon antibody (green). Proliferated  $\alpha$ -cells were still labeled by RFP, while precursor-differentiated new  $\alpha$ -cells were RFP negative (white arrowhead). c, The  $\alpha$ -cells were labeled by RFP in *Ai9;Gcg<sup>iCre</sup>* reporter mice. IF was performed using anti-insulin (GFP) with pancreatic sections from mice before and during pregnancy. Co-expression of RFP and GFP indicates transdifferentiation. The bar is 50  $\mu$ m.

**Suppl. Fig. 2. GCG promoter-directed Cre expression and changes of blood GLP-1 concentrations of  $\alpha$ -null mice.** a, The *mTmG;Gcg<sup>CreErt2</sup>* reporter mice were gavaged with tamoxifen (1 mg per day) for 5 days. Cre expression turned on GFP gene expression and turned off RFP. GFP was observed only in  $\alpha$ -cells, intestinal L-cells but not in the brainstem. b, Serum total GLP-1 concentrations were measured using an ELISA kit.
