# Supplementary material
Source: publisher figshare collection journal article supplement (https://diabetesjournals.figshare.com/articles/dataset/_/19134545)

## Supplemental Figure 1

Fig. 1a

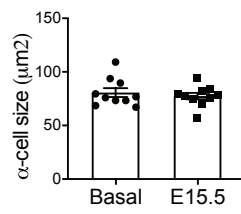

Fig. 1b

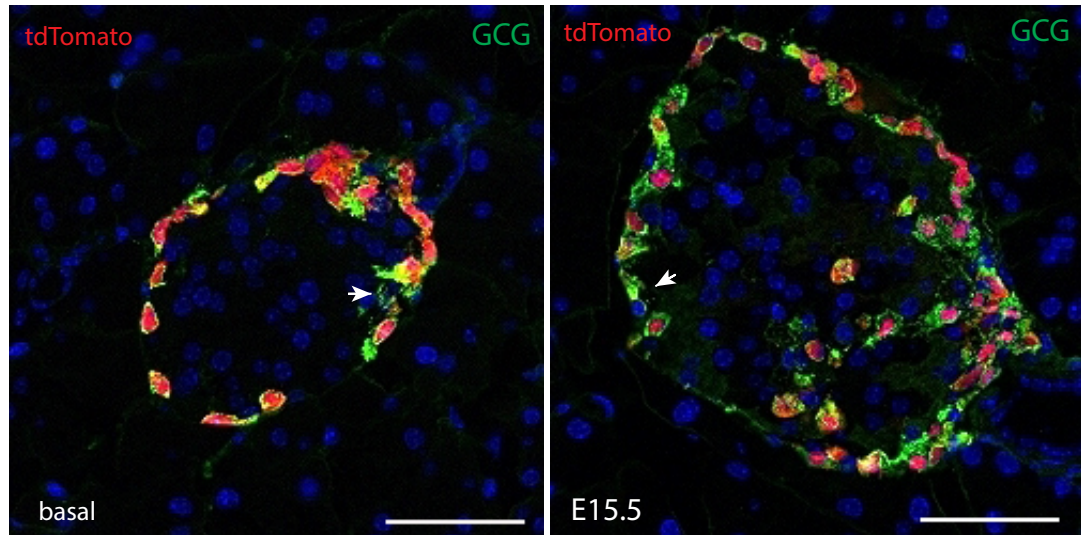

Fig. 1c

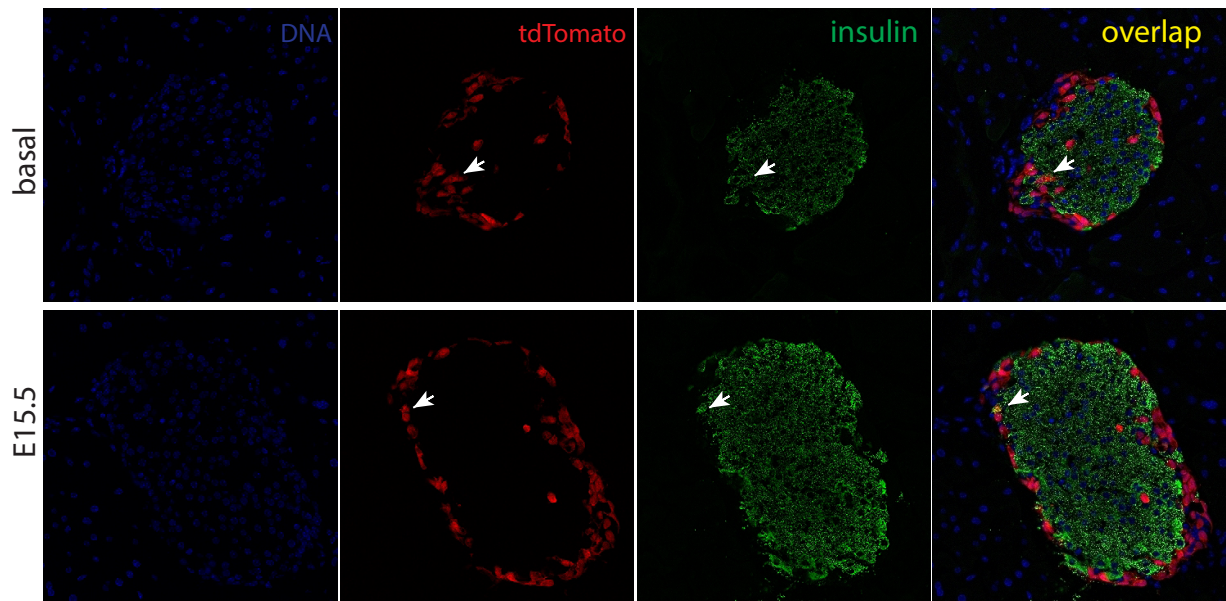

## Supplemental Figure 2

Fig. 2a

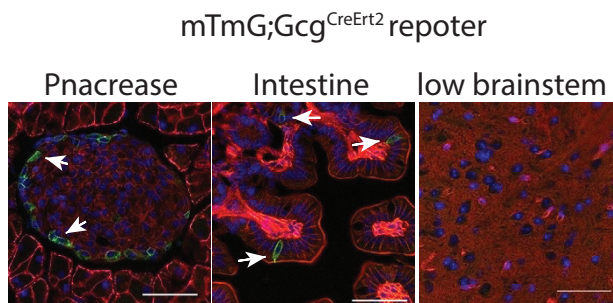

Fig. 2b

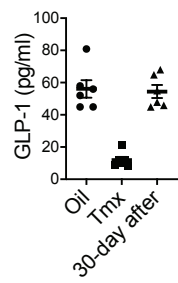

Supplement: Supplementary file 3 [file 1]
